# Supplementary material for: Olive Actual “on Year” Yield Forecast Tool Based on the Tree Canopy Geometry Using UAS Imagery
Source: MDPI journal article supplement (doi:10.3390/s17081743), 2017-07-30
Supplement: s1 [file s1]

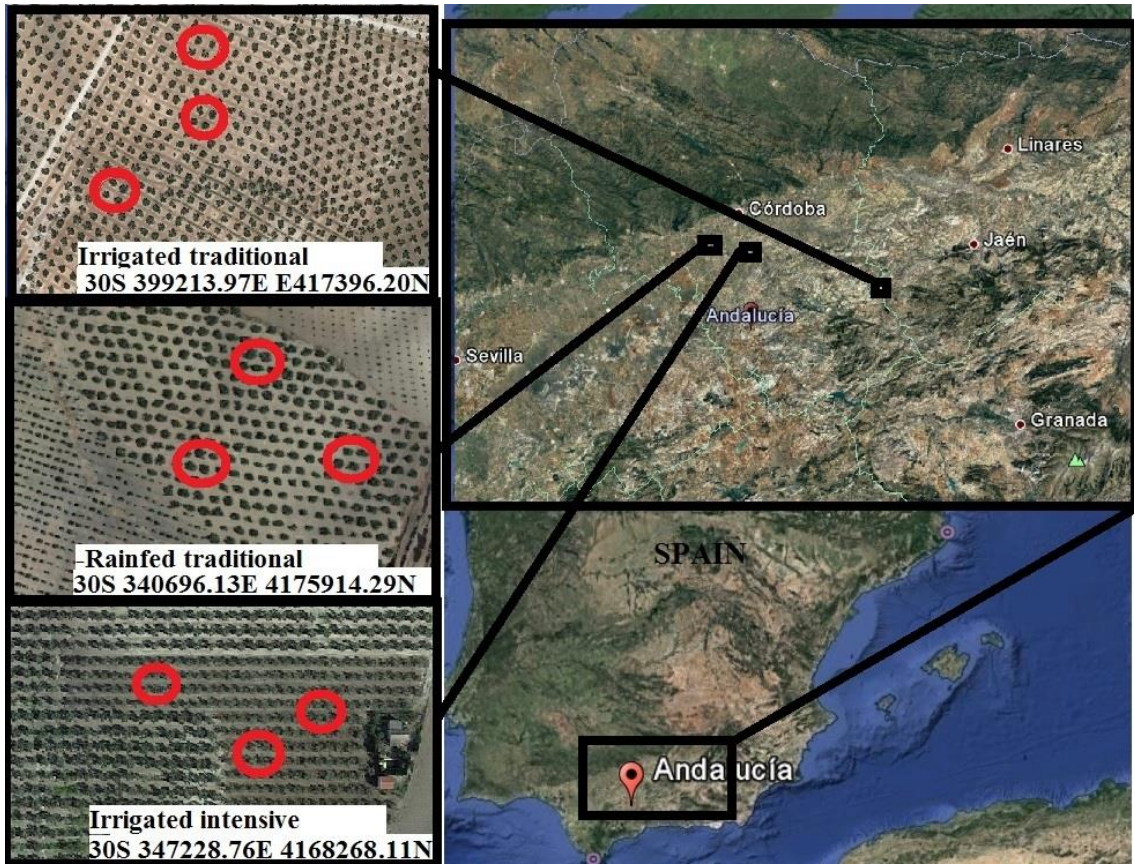

Figure 0. Geographical distribution of olive orchards and trees investigated for the model between the individual crown contour of trees (ICA) manual canopy volume (MCV) and actual yield (AY)
